# Supplementary figures and images for: Curvature-controlled geometrical lensing behavior in self-propelled colloidal particle systems
Source: Royal Society of Chemistry journal article supplement (doi:10.1039/d2sm01012g), 2022-01-01

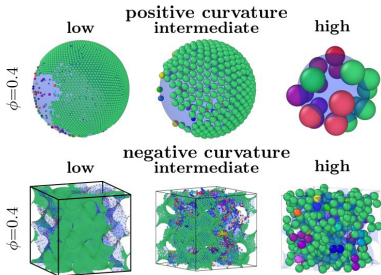

Supplement: d2sm01012g1.pdf [file d2sm01012g1.pdf]
